# Supplementary material
Source: PubMed Central journal article supplement (PMC6881790)
Supplement: AEM.01552-19-s0001.pdf [file AEM.01552-19-s0001.pdf]

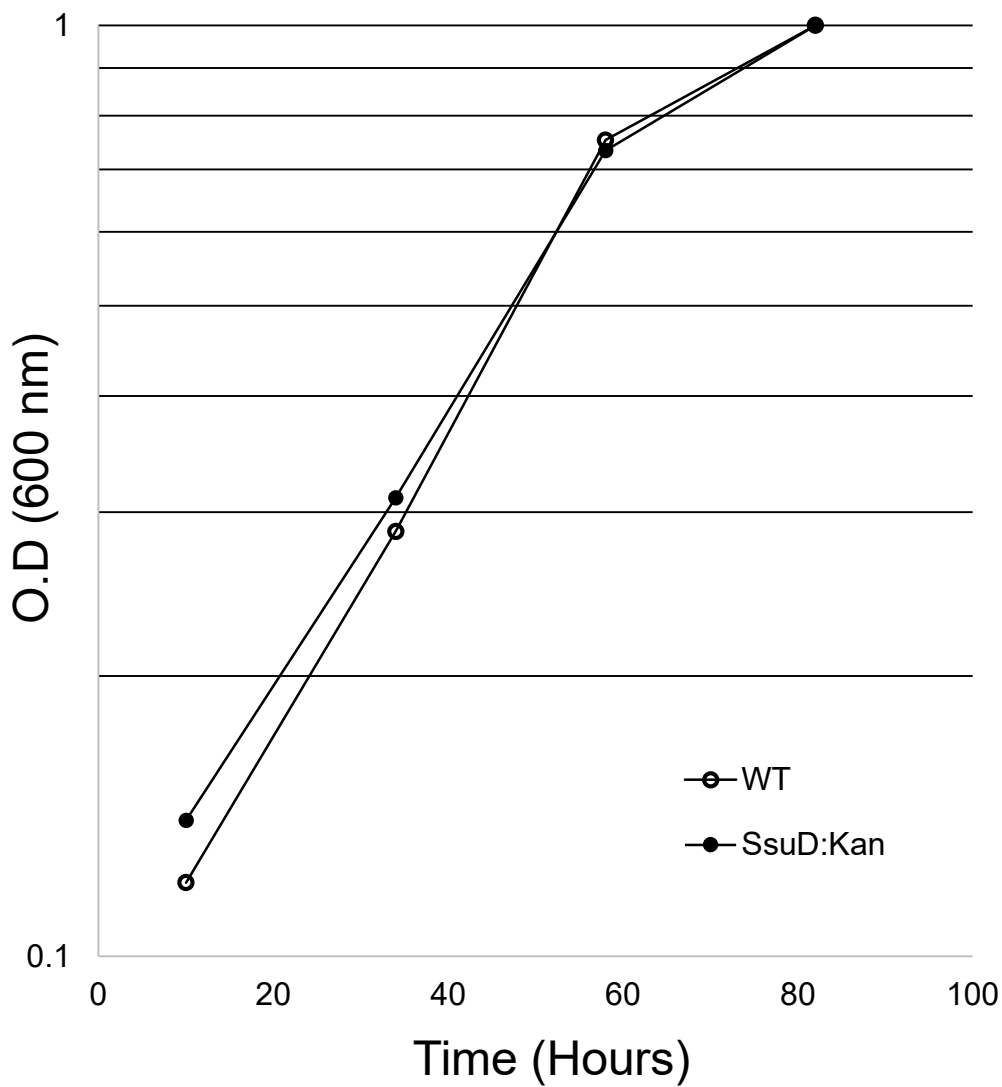

**Figure S1. Growth of USDA110 WT and *ssuD:Kan* in minimal medium containing sulfate as sulfur source. No significant difference in growth rates was found.**
